# Supplementary material
Source: publisher figshare collection journal article supplement (https://sage.figshare.com/ndownloader/files/22068105)
Supplement: Supplementary file 1 [file 22068105]

**Supplementary Table 1.** Mediation analysis predicting tau in DVARs with age and sex covariates

|                                  | Effect | 95% CI              | SE           | <i>t</i> | <i>p</i> |
|----------------------------------|--------|---------------------|--------------|----------|----------|
| Total effect                     | 4.42   | [0.56, 8.28]        | 1.95         | 2.27     | .025     |
| Direct effect                    | 3.07   | [-0.71, 6.86]       | 1.91         | 1.61     | .111     |
| ADHD diagnosis → Omission errors | 2.84   | [0.42, 5.26]        | 1.22         | 2.32     | .022     |
| Omission errors → Tau in DVARs   | 0.47   | [0.19, 0.76]        | 0.14         | 3.30     | .001     |
|                                  | Effect | Bootstrap<br>95% CI | Bootstrap SE |          |          |
| Total indirect effect            | 1.35   | [0.09, 3.26]        | 0.83         |          |          |

*Note.* Coefficients for the model testing the mediating effect of omission errors on the relationship between ADHD diagnosis and tau in delta variation signal (DVARs) with age and sex covariates.

95% confidence intervals (CI) for indirect effect based on 5000 bootstrap samples. SE, standard error.
